# Supplementary material for: Controlled synthesis of AgInS2 nanocrystals and their application in organic–inorganic hybrid photodetectors
Source: Royal Society of Chemistry journal article supplement (doi:10.1039/c3ce40173a), 2013-01-01
Supplement: c3ce40173a.pdf [file c3ce40173a.pdf]

## Electronic Supplementary Information

### Controlled Synthesis of AgInS<sub>2</sub> Nanocrystals and Their Application in Organic-Inorganic Hybrid Photodetectors

Manjiao Deng,<sup>a,b,c</sup> Shuling Shen,<sup>b,c</sup> Xuewen Wang,<sup>c</sup> Yejun Zhang,<sup>b,c</sup> Huarui Xu,<sup>a\*</sup> Ting Zhang,<sup>c\*</sup> and Qiangbin Wang<sup>b,c\*</sup>

<sup>a</sup>School of Material Science and Engineering, Guilin University of Electronic Technology, Guilin 541004, P. R. China

<sup>b</sup>Division of Nanobiomedicine and <sup>c</sup>i-Lab, Suzhou Institute of Nano-Tech and Nano-Bionics, Chinese Academy of Sciences, Suzhou 215123, P. R. China

Email: [qbwang2008@sinano.ac.cn](mailto:qbwang2008@sinano.ac.cn), [tzhang2010@sinano.ac.cn](mailto:tzhang2010@sinano.ac.cn), [huaruixu@guet.edu.cn](mailto:huaruixu@guet.edu.cn)

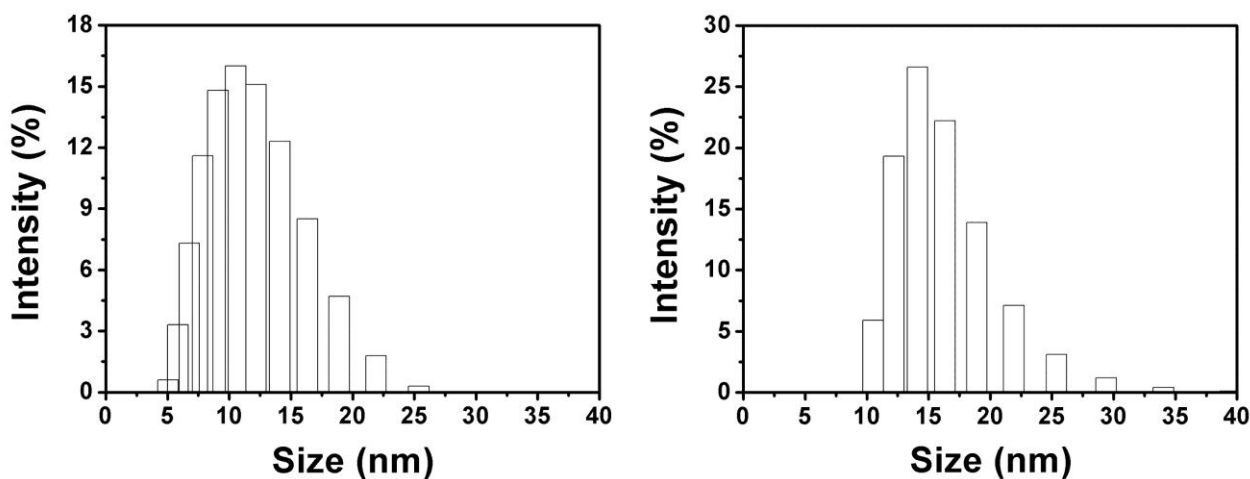

**Figure S1.** DLS data of the single- (left) and dimer-AgInS<sub>2</sub> (right) NCs, which illustrate that the dimer structures are formed during the reaction, instead of the resultant from the TEM sampling.

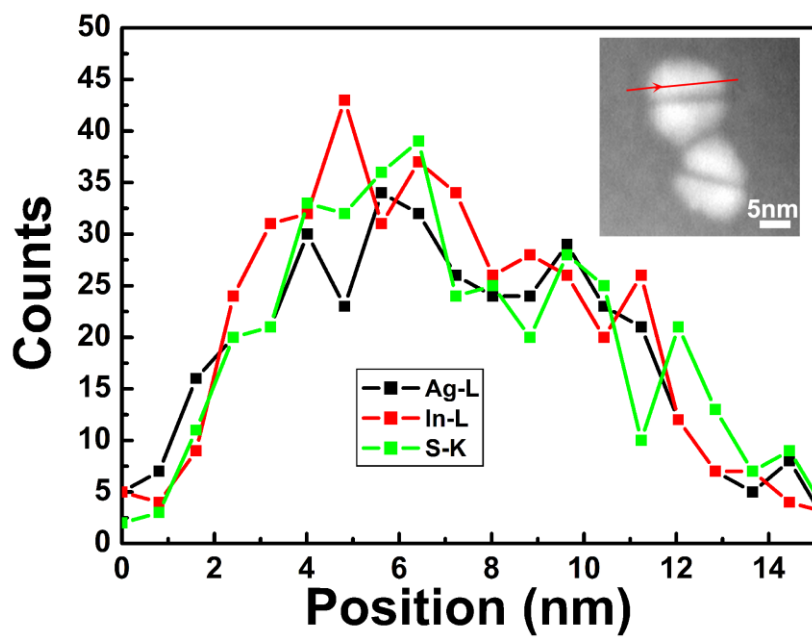

**Figure S2.** Elemental profiles of Ag, In and S (see the red line in the inset HAADF-STEM image). The results illustrate the successful preparation of AgInS<sub>2</sub> NCs.

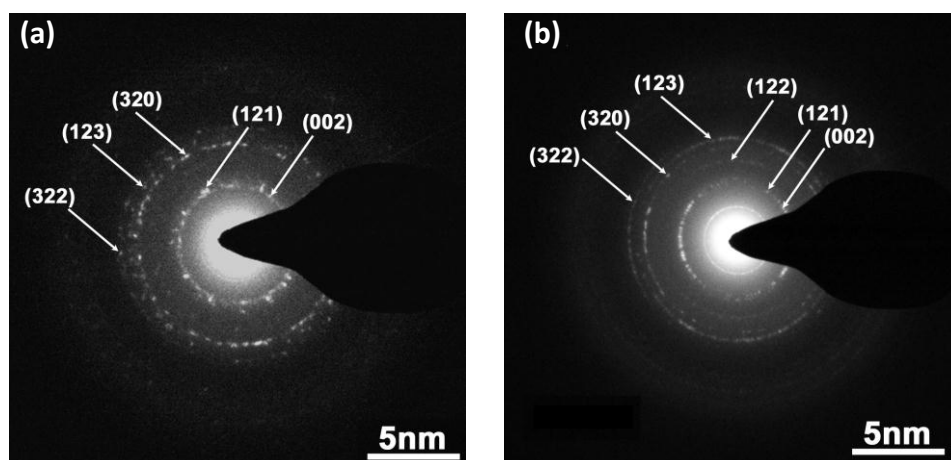

**Figure S3.** SAED patterns of (a) single-AgInS<sub>2</sub> and (b) dimer-AgInS<sub>2</sub>
